# Supplementary material for: Plasma Metabolomics Reveals β-Glucan Improves Muscle Strength and Exercise Capacity in Athletes
Source: MDPI journal article supplement (doi:10.3390/metabo12100988), 2022-10-18
Supplement: s1 [file s1]

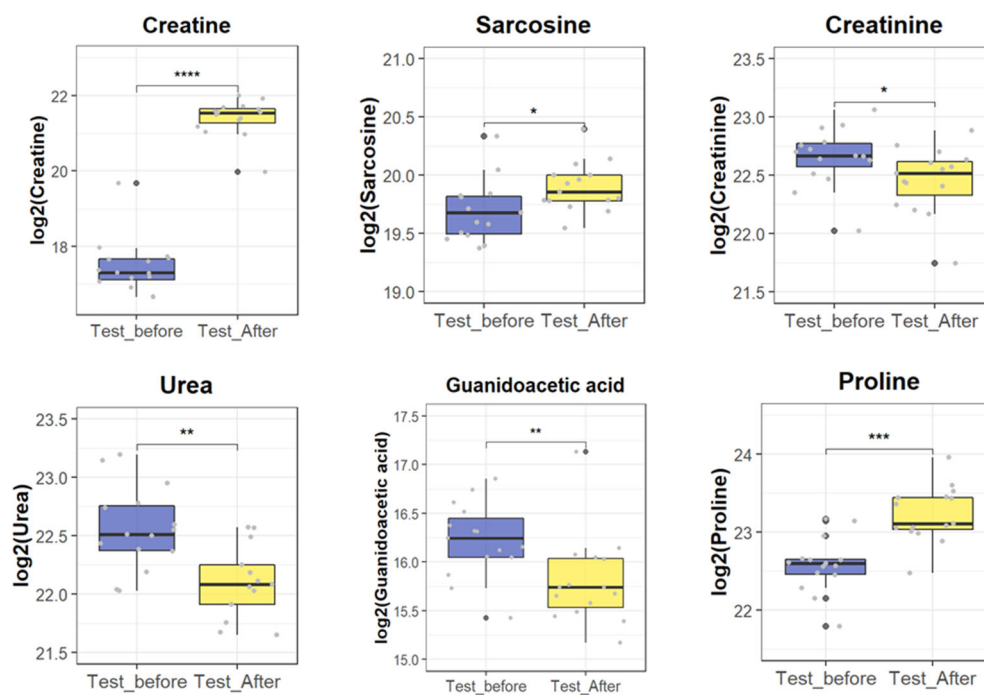

**Figure S1.** Changes in related metabolites after  $\beta$ -glucan supplementation. Wilcoxon rank-sum tests; \* $p < 0.05$ , \*\* $p < 0.01$ , \*\*\* $p < 0.001$ , \*\*\*\* $p < 0.0001$ . Details of correlation were shown in Supplementary Figure1.
